# Supplementary material for: Thermal effect on C–H stretching vibrations of the imidazolium ring in ionic liquids
Source: Royal Society of Chemistry journal article supplement (doi:10.1039/b706497g), 2007-01-01
Supplement: b706497g.pdf [file b706497g.pdf]

## Supporting Online Material for

### Thermal Effect on C-H Stretching Vibrations of the Imidazolium Ring in Ionic Liquids

A. Yokozeki<sup>1\*</sup>, Daniel J. Kasprzak<sup>2)</sup>, and Mark B. Shiflett<sup>2)</sup>

<sup>1)</sup>DuPont Fluoroproducts Laboratory, Chestnut Run Plaza 711  
Wilmington, Delaware 19880 USA.

<sup>2)</sup>DuPont Central Research and Development, Experimental Station  
Wilmington, Delaware 19880 USA.

<sup>\*</sup>To whom correspondence should be addressed.

#### **This file includes:**

Materials  
References

**A Simple Oscillator Model.** In order to understand the observed *T*-dependent behaviors of IR spectra, we consider here a forced damping oscillator

model, with a mass  $m$  and a spring (or force) constant  $s$  under friction (resistance  $b$ : kg s<sup>-1</sup> unit) with an external force  $f \cos \omega t$ , as illustrated in Figure 6. The external force would correspond to the applied IR light wave with an angular frequency ( $\omega$ ), and the oscillator to the C-H stretching vibrator with a drag force ( $F_d$ ), which depends only on its velocity (for a given homogeneous medium):

$$F_d = -b \frac{dx}{dt}. \quad (1)$$

Then, the equation of motion can be written as:

$$\frac{d^2x}{dt^2} + \gamma \frac{dx}{dt} + \frac{s}{m}x = \frac{f}{m} \cos \omega t, \quad (2)$$

where  $\gamma$  is called the *damping coefficient* (or *spectral width*),

$$\gamma = b/m. \quad (3)$$

A physical model of the drag force (or  $b$  and  $\gamma$ ) will be discussed in the next section.

The solution of eq 2 can be obtained by a standard mathematical method<sup>S1,S2</sup> and is given by:

$$x = a \exp\left(-\frac{\gamma}{2}t\right) \cos(\omega_f t + \theta) + A \cos(\omega t + \delta). \quad (4)$$

In the steady state (or after a sufficient time), the first term becomes zero and then the displacement  $x$  in eq 4 results in:

$$x = A \cos(\omega t + \delta), \quad (5)$$

where the amplitude  $A$  and the phase constant  $\delta$  are not arbitrary and they are given by:

$$A = \frac{f}{m \sqrt{(\omega_0^2 - \omega^2)^2 + \gamma^2 \omega^2}}, \quad (6)$$

$$\tan \delta = \frac{\gamma \omega}{\omega^2 - \omega_0^2}, \quad (7)$$

$$\omega_0 = \sqrt{s/m}. \quad (8)$$

Here,  $\omega_0$  is a harmonic oscillator (or normal mode) frequency of the stretching vibration. For a given amplitude  $f$  of the external force, the amplitude  $A$  of the oscillations is greatest at the following resonance frequency (from  $dA/d\omega = 0$ ):

$$\omega_r = \sqrt{\omega_0^2 - \gamma^2/2} = \omega_0 \left[ 1 - 2 \left( \frac{\gamma}{2\omega_0} \right)^2 \right]^{1/2}. \quad (9)$$

In the case of IR absorption spectra, where  $\gamma \ll \omega_0$  (or so-called large resonance  $Q$  values:  $Q \equiv \omega_0/\gamma \gg 1$ ),  $\omega_r$  differs from  $\omega_0$  only by a quantity of the second order of smallness and can be approximated by:

$$\omega_r / \omega_0 \approx 1 - \left( \frac{\gamma}{2\omega_0} \right)^2.$$

(10)

Now, we are interested in the power absorption ( $P$ ) by the forced damping oscillator. Energy is continually absorbed by the system from the external force and dissipated by friction. The maintenance of the steady-state vibration requires a sustained supply of energy by the driving force. When the mass moves from  $x$  to  $\Delta x$ , the work done by the drag force ( $F_d$ ) is  $-F_d \Delta x$ . If the movement takes time  $\Delta t$ , the rate at which energy is dissipated is  $F_d (\Delta x / \Delta t)$ . In the limit  $\Delta t \rightarrow 0$ , this becomes the instantaneous power absorption:

$$P = -F_d \frac{dx}{dt} = b \left( \frac{dx}{dt} \right)^2 = b \omega^2 A^2 \sin^2(\omega t + \delta),$$

(11)

where eq 1 is used for  $F_d$  and eq 5 for  $x$ .

The average power  $\langle P \rangle$  (or denoted as  $I(\omega)$ ) over many cycles is thus obtained, using eqs 3 and 6 as:

$$I(\omega) \equiv \langle P \rangle = \frac{b\omega^2 A^2}{2} = \frac{f^2}{2m\gamma} \frac{(\gamma\omega)^2}{(\omega_0^2 - \omega^2)^2 + (\gamma\omega)^2}.$$

(12)

When the driving force frequency  $\omega$  is close to  $\omega_0$  and the damping is very light ( $Q \equiv \omega_0 / \gamma \gg 1$ ), we have:

$$\omega / \omega_0 \approx 1$$

(13)

$$\omega_0^2 - \omega^2 = (\omega_0 + \omega)(\omega_0 - \omega) \approx 2\omega_0(\omega_0 - \omega)$$

(14)

Then, eq 12 is simplified as:

$$I(\omega) = \frac{f^2}{2m\gamma} \frac{(\gamma/2)^2}{(\omega_0 - \omega)^2 + (\gamma/2)^2}.$$

(15)

This power spectrum is known as a Lorentzian line shape. The height of the maximum is  $I(\omega_0) = f^2 / 2m\gamma$ , and inversely proportional to  $\gamma$ , which is the *full width* of the line shape at its *half* maximum (often called *half-width*). Thus, when the damping coefficient  $\gamma$  decreases, the line shape becomes more peaked. However, the area under the curve remains unchanged, being independent of  $\gamma$  and  $\omega_0$ :

$$\int I(\omega) d\omega = \int_{-\infty}^{\infty} I(\xi) d\xi = \frac{\pi f^2}{4m},$$

(16)

where  $\xi \equiv \omega_0 - \omega$ .

In this section, using a forced damping oscillator model, we have shown that the IR spectra will possess a Lorentzian line shape characterized by a spectral (full) width of  $\gamma$  and that a small frequency shift (from the normal mode) is proportional to  $-\gamma^2$ ; see eq 10. In the next section, we make a simple model for the friction force (or  $b$  and  $\gamma$ ), in order to correlate the temperature dependence of  $\gamma$ .

**Thermal Effects on Oscillators.** In our forced damping oscillator model (Figure 6), the mass  $m$  (or a hydrogen atom in C-H stretching vibrations) would experience a frictional force ( $F_d$ ), which may be modeled as collisional resistance due to surrounding (randomly moving) molecules in the liquid phase. Then, friction constant,  $b$  (unit: kg s<sup>-1</sup>), may be given by a “hard friction” model<sup>S3</sup> for the hard sphere (diameter of  $\sigma$ ) repulsion:

$$b = \frac{8}{3} n g(\sigma) \sigma^2 (\pi m k T)^{1/2},$$

(17)

where  $n$  is the number density,  $m$  the mass of the sphere,  $g(\sigma)$  the radial distribution (dimensionless) function at  $r = \sigma$ , and usual meanings for  $\pi$  and  $k$ . In the condensed phase,  $n$  will be proportional to  $1/\sigma^3$ . Then, this equation becomes:

$$b \propto \frac{g(\sigma)}{\sigma} (m k T)^{1/2}.$$

(18)

When the temperature dependence on  $g(\sigma)/\sigma$  can be ignored,  $b$  or  $\gamma$  ( $= b/m$ ; see eq 3) increases with temperature or is proportional to  $\sqrt{T}$ . The same result can be obtained by the use of Stokes law and the kinetic theory of gases. According to the Stokes law, the friction constant is proportional to a radius of particles and an ambient

viscosity, which is proportional to  $\sqrt{mT}$  based on the gas kinetic theory for thermal motions of particles. Thus, the spectral width  $\gamma$  is:

$$\gamma \propto \sqrt{T},$$

(19)

and the resonance frequency (or peak frequency of the line shape) will decrease with  $T$  by a small amount when  $Q \gg 1$  according to eq 10:

$$\omega_r \propto -\gamma^2 \propto -T.$$

(20)

#### References:

(S1) Landau, L. D.; Lifshitz, E. M. *Mechanics*; 3<sup>rd</sup> ed. Pergamon: New York, 1976, 74.

(S2) Main, I. G. *Vibrations and Waves in Physics*; Cambridge Univ. Press: Cambridge, 1978, 56.

(S3) Croxton, C. *Introduction to Liquid State Physics*; John Wiley & Sons: New York, 1975, 256.
